# Supplementary material for: Burnout among diabetes specialist registrars across the United Kingdom in the post-pandemic era
Source: Frontiers journal article supplement (doi:10.3389/fmed.2024.1367103), 2024-03-26
Supplement: Data_Sheet_2.pdf [file Data_Sheet_2.pdf]

## **Supplementary file 2: Details of the participants of the survey**

The participants of this survey included Diabetes and Endocrinology Specialty trainee Registrars (D&E-StRs) from all deaneries across England, Scotland, Wales and Northern Ireland including:

- o Health Education Yorkshire & Humber
- o Health Education East Midlands
- o Health Education East of England
- o Health Education Kent Surrey & Sussex
- o Health Education North West & Mersey Deanery
- o Health Education North East
- o Health Education South West Peninsula and Severn Deanery
- o Health Education Thames Valley (Oxford)
- o Health Education Wessex
- o Health Education West Midlands
- o London Deanery (North West, North Central & East London, South London)
- o Northern Ireland Medical & Dental Training Agency
- o Scotland Deanery (West, South East, East, North)
- o Wales Deanery associated with the following deaneries in United Kingdom

The Diabetes and Endocrinology Specialty trainee Registrars (D&E-StRs) participants were holding the position of Specialist trainee in Diabetes and Endocrine with national training number from year 4 to year 8 but also included trainees without national training number in the following post

- Clinical fellow/ non-deanery training post/locally employed specialty trainee doctor
- o Academic clinical fellow trainee (ACF)
- o Core Trainee or Specialist trainee year 3/ awaiting National Training Number
- o Associate Specialist Equivalent/Trust middle grade

- o Clinical Lecturer
- o Diabetes consultant (new i.e within 3 years of appointment, locum, fixed term or substantive)
